# Supplementary material for: OsGIF1 Positively Regulates the Sizes of Stems, Leaves, and Grains in Rice
Source: PubMed Central journal article supplement (PMC5633614; doi:10.3389/fpls.2017.01730), 2017-10-05
Supplement: Presentation_1.pdf [file Presentation_1.pdf]

# ***OsGIF1* Positively Regulates the Sizes of Stems, Leaves and Grains in Rice**

Zhongshan He<sup>1,2#</sup>, Jing Zeng<sup>1,2#</sup>, Yun Ren<sup>1,2</sup>, Dan Chen<sup>1,2</sup>, Wenjie Li<sup>1,2</sup>, Fengyan Gao<sup>1,2</sup>, Ye Cao<sup>1,2</sup>, Tao Luo<sup>1,2</sup>, Guoqiang Yuan<sup>1,2</sup>, Xianghong Wu<sup>1,2</sup>, Yueyang Liang<sup>1,2</sup>, Qiming Deng<sup>1,2</sup>, Shiquan Wang<sup>1,2</sup>, Aiping Zheng<sup>1,2</sup>, Jun Zhu<sup>1,2</sup>, Huainian Liu<sup>1,2</sup>, Lingxia Wang<sup>1,2</sup>, Ping Li<sup>1,2,3\*</sup>, Shuangcheng Li<sup>1,2\*</sup>

# These two authors contribute equally to this work

\* Corresponding author: Ping Li ([liping6575@163.com](mailto:liping6575@163.com)) and Shuangcheng Li ([lisc926105@163.com](mailto:lisc926105@163.com))

<sup>1</sup> State Key Laboratory of Hybrid Rice, Sichuan Agricultural University, Chengdu 611130, China;

<sup>2</sup> Rice Research Institute, Sichuan Agricultural University, 211 Huimin Road, Wenjiang 611130, Sichuan, China;

<sup>3</sup> State Key Laboratory of Hybrid Rice, Hunan Hybrid Rice Research Center, Changsha 410125, China.

# 1 Supplementary Figures and Tables

## 1.1 Supplementary Figures

|           |                                                      |     |
|-----------|------------------------------------------------------|-----|
| OSGIF-1   | MQQQHLMQMNQGMGGYASPTTVTTDLIQQYLDENKQLIL              | 40  |
| T407-19   | MQQQHLMQMNQGMGGYASPTTVTTDLIQQYLDENKQLIL              | 40  |
| T408-14   | MQQQHLMQMNQGMGGYASPTTVTTDLIQQYLDENKQLIL              | 40  |
| T409-2    | MQQQHLMQMNQGMGGYASPTTVTTDLIQQYLDENKQLIL              | 40  |
| T408-6    | MQQQHLMQMNQGMGGYASPTTVTTDLIQQYLDENKQLIL              | 40  |
| T409-17   | MQQQHLMQMNQGMGGYASPTTVTTDLIQQYLDENKQLIL              | 40  |
| T406-8    | MQQQHLMQMNQGMGGYASPTTVTTDLIQQYLDENKQLIL              | 40  |
| Consensus | mqqqhlmqmnqgmgyaspttvttqliqqyldenqllil               |     |
|           |                                                      |     |
| OSGIF-1   | AILDNQNGKVEECARNQAKLQHNLMYLAAIADSQPPQTA              | 80  |
| T407-19   | AILDNQNGKVEECARNQAKLQHNLMYLAAIADSQPPQTA              | 80  |
| T408-14   | AILDNQNGKVEECARNQAKLQHNLMYLAAIADSQPPQTA              | 80  |
| T409-2    | AILDNQNGKVEECARNQAKLQHNLMYLAAIADSQPPQTA              | 80  |
| T408-6    | AILDNQNGKVEECARNQAKLQHNLMYLAAIADSQPPQTA              | 80  |
| T409-17   | AILDNQNGKVEECARNQAKLQHNLMYLAAIADSQPPQTA              | 80  |
| T406-8    | AILDNQNGKVEECARNQAKLQHNLMYLAAIADSQPPQTA              | 80  |
| Consensus | aildnqnngkveecarnqaklqhnlmylaaiadsqppqta             |     |
|           |                                                      |     |
| OSGIF-1   | AMSQYFNSLMMQSGAP...PQQSAQMMAFQSLMAARSSMMY            | 120 |
| T407-19   | AMSQYFNSLMMQS...ARY...PQQSAQMMAFQSLMAARSSMMY         | 119 |
| T408-14   | AMSQYFNSLMMQS...ARY...PQQSAQMMAFQSLMAARSSMMY         | 119 |
| T409-2    | AMSQYFNSL...P...PQQSAQMMAFQSLMAARSSMMY               | 114 |
| T408-6    | AMSQYFNSLMM...P...PSSRRR... ..                       | 101 |
| T409-17   | AMSQYFNSLMMQSG...AAV...GADDGA...AVADGGEVFDDV         | 120 |
| T406-8    | AMFFVSV...PDDAVR...GEV...AAV...GADDGA...AVADGGEVFDDV | 120 |
| Consensus | am                                                   |     |
|           |                                                      |     |
| OSGIF-1   | AQFALSPLQQQQQQAAAAHGQLGMSGGTTSGFSILHGE               | 160 |
| T407-19   | AQFALSPLQQQQQQAAAAHGQLGMSGGTTSGFSILHGE               | 159 |
| T408-14   | AQFALSPLQQQQQQAAAAHGQLGMSGGTTSGFSILHGE               | 159 |
| T409-2    | AQFALSPLQQQQQQAAAAHGQLGMSGGTTSGFSILHGE               | 154 |
| T408-6    | .....                                                | 101 |
| T409-17   | RAAGAV...A...PAAAAAAGGGGARAAGHGLGGHHQRVQHPPRR        | 160 |
| T406-8    | RAAGAV...A...PAAAAAAGGGGARAAGHGLGGHHQRVQHPPRR        | 160 |
| Consensus |                                                      |     |
|           |                                                      |     |
| OSGIF-1   | ASMGGGGGGGAGNSMMNAGVFSDFGRGGGGGGKEGSTSL              | 200 |
| T407-19   | ASMGGGGGGGAGNSMMNAGVFSDFGRGGGGGGKEGSTSL              | 199 |
| T408-14   | ASMGGGGGGGAGNSMMNAGVFSDFGRGGGGGGKEGSTSL              | 199 |
| T409-2    | ASMGGGGGGGAGNSMMNAGVFSDFGRGGGGGGKEGSTSL              | 194 |
| T408-6    | .....                                                | 101 |
| T409-17   | GQH...RRRRRRR... ..                                  | 173 |
| T406-8    | GQH...RRRRRRR... ..                                  | 173 |
| Consensus |                                                      |     |
|           |                                                      |     |
| OSGIF-1   | SVDVRGANSQAQSGDGEYLGTEEEGS..                         | 227 |
| T407-19   | SVDVRGANSQAQSGDGEYLGTEEEGS..                         | 226 |
| T408-14   | SVDVRGANSQAQSGDGEYLGTEEEGS..                         | 226 |
| T409-2    | SVDVRGANSQAQSGDGEYLGTEEEGS..                         | 221 |
| T408-6    | .....                                                | 101 |
| T409-17   | .....                                                | 173 |
| T406-8    | .....                                                | 173 |
| Consensus |                                                      |     |

**Supplementary Figure 1. Putative amino acid sequence alignments across all mutants.**

A red arrow head indicates the target mutation, and a black arrow head indicates premature stop codon caused by the target mutation. Different background colors indicate different identities of multiple sequence alignments.

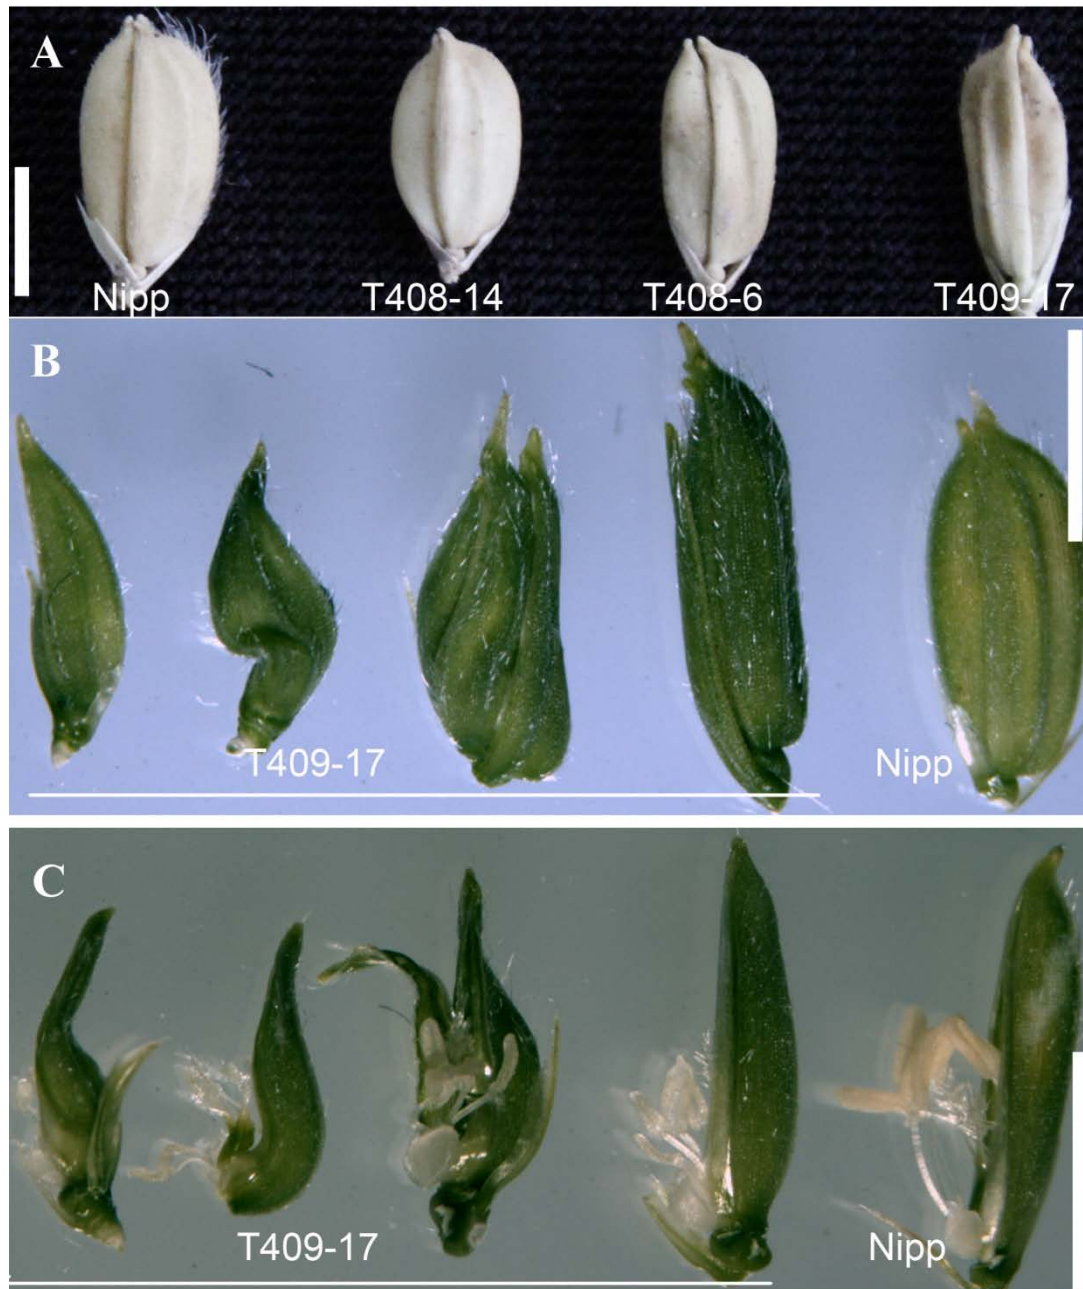

**Supplementary Figure 2. Grain and floral organ observations in KO mutants.**

(A) grain; (B) spikelet; (C) floral structure. Scale bar, 5mm.

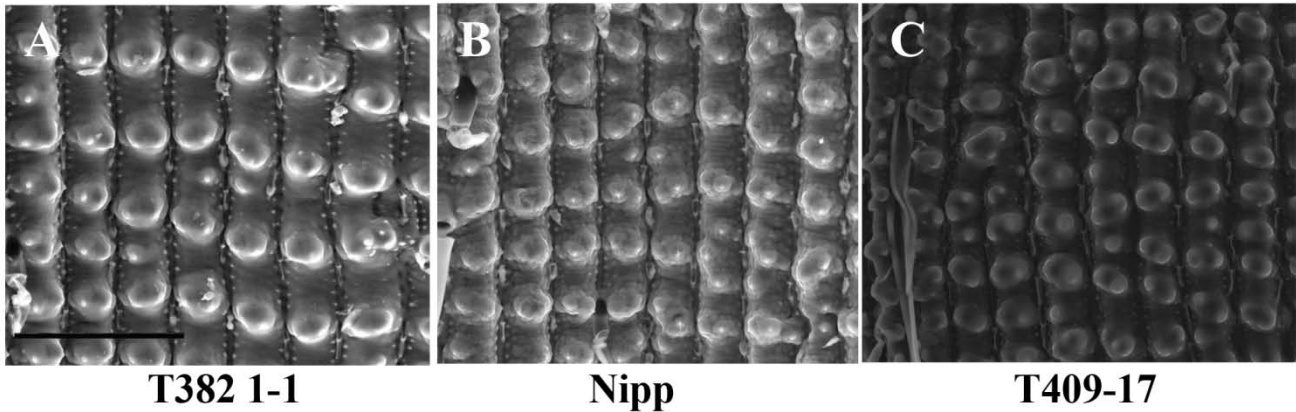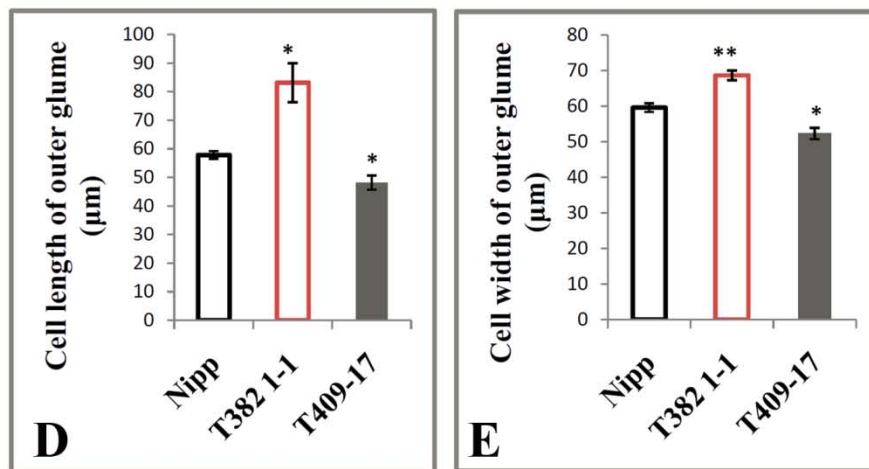

**Supplementary Figure 3. SEM analysis of the outer glumes in KO and overexpression plants.**

(A-C), SEM analysis of the outer glumes in KO and overexpression plants; Scale bar, 200 μm; (D), cell length of the outer glume; (E), cell width of the outer glume. Scale bar, 200 μm. Values are all shown as mean ± s.e.m (n=3). Asterisks indicate significant differences between the WT and overexpression/KO plants as determined by Student's *t*-test: ns, not significant; \*\*,  $p \leq 0.01$ ; \*,  $p \leq 0.05$ .

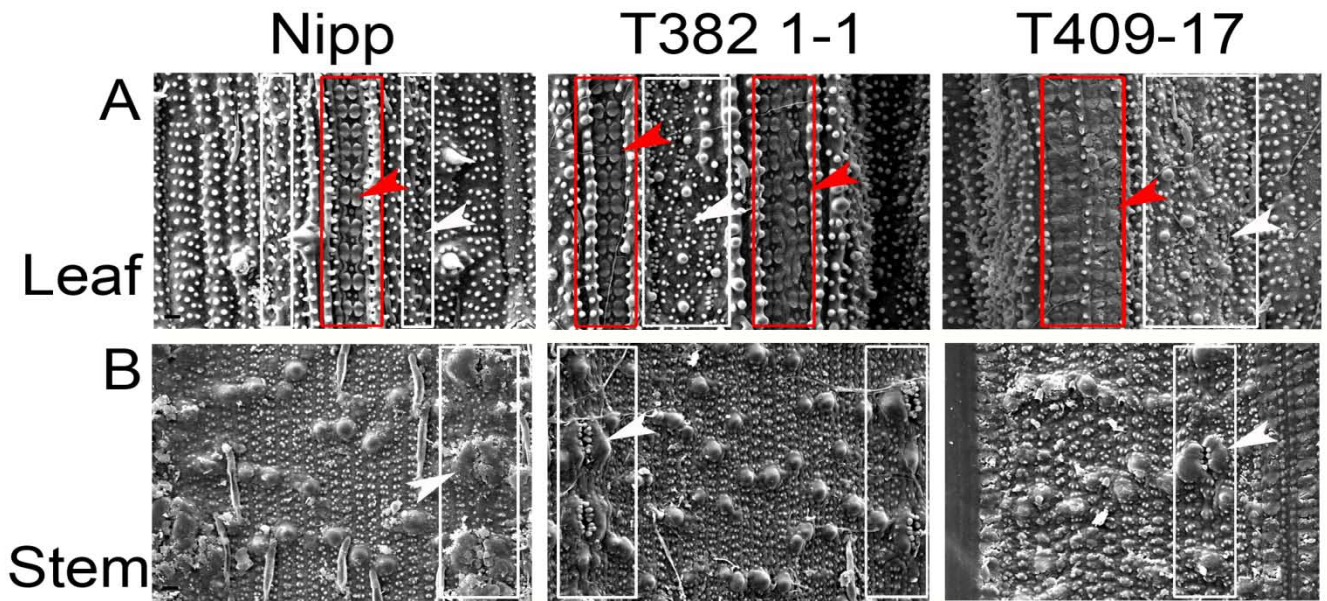

**Supplementary Figure 4. SEM analysis of the outer surfaces of leaves and stems of KO and overexpression plants.**

(A) SEM analysis of the outer surfaces of leaves. (B) SEM analysis of the outer surfaces of stems. Dotted boxes in red indicate the longitudinal array of dumbbell silicon cells, and dotted boxes in white indicate longitudinal array of stoma guard cells. Red arrow heads indicate dumbbell silicon cells, and white arrow heads indicate stoma guard cells. Scale bars, 10 μm.

## 1.2 Supplementary Tables

### Supplementary Table 1. Primers used in this study

| Primer name | Sequence (5'-3')                | Purpose                                 |
|-------------|---------------------------------|-----------------------------------------|
| GIF1C-F     | GCCGGATCCATGCAGCAGCAACACCTG     | GIF1-cDNA, Transgenic construct         |
| GIF1C-R     | GGACTAGTGCTGCCTTCCTCCTCGGTG     | GIF1-cDNA, Transgenic construct         |
| PGIF1-GUS-F | ACGCGTCGACGAGAGGAGTCCGACCTCAAT  | Promoter analysis, Transgenic construct |
| PGIF1-GUS-R | ACGCGTCGACTCCAATCAAAAACCTTTATAC | Promoter analysis, Transgenic construct |
| GIF1-GFP-F  | GCCGGATCCATGCAGCAGCAACACCTG     | GFP, Subcellular localization           |
| GIF1-GFP-R  | GGACTAGTGCTGCCTTCCTCCTCGGTG     | GFP, Subcellular localization           |
| qGIF1-F     | TGCTTCCCCTACCACCGTC             | q-RT-PCR                                |
| qGIF1-R     | CGAGCGCACTCTCCACCT              | q-RT-PCR                                |
| Actin-F     | CTTCATAGGAATGGAAGCTGCGGGT       | Internal reference                      |
| Actin-R     | CGACCACCTTGATCTTCATGCTGCTA      | Internal reference                      |

### Supplementary Table 2. Information of four putative off-target sites

| putative sites      | TIGR loci      | Physical positions      | sequence               | Mutations detected |
|---------------------|----------------|-------------------------|------------------------|--------------------|
| <i>OFF TARGET-1</i> | LOC_Os03g55100 | Chr3:31345129..31345150 | GATGATGAAGGCCGGGACGAGG | none               |
| <i>OFF TARGET-2</i> | LOC_Os03g05806 | Chr3:2901783..2901802   | CGCCCCGACTTCAACATCA    | none               |
| <i>OFF TARGET-3</i> | LOC_Os04g03890 | Chr4:1780086..1780107   | CCCCGCCCGAACGGCATCATC  | none               |
| <i>OFF TARGET-4</i> | LOC_Os07g30210 | Chr7:17847716..17847737 | GAAGATGAAGACCGGGGCGAGG | none               |
